# Supplementary material
Source: MDPI journal article supplement (https://www.mdpi.com/2072-4292/11/5/506)
Supplement: s1 [file s1]

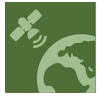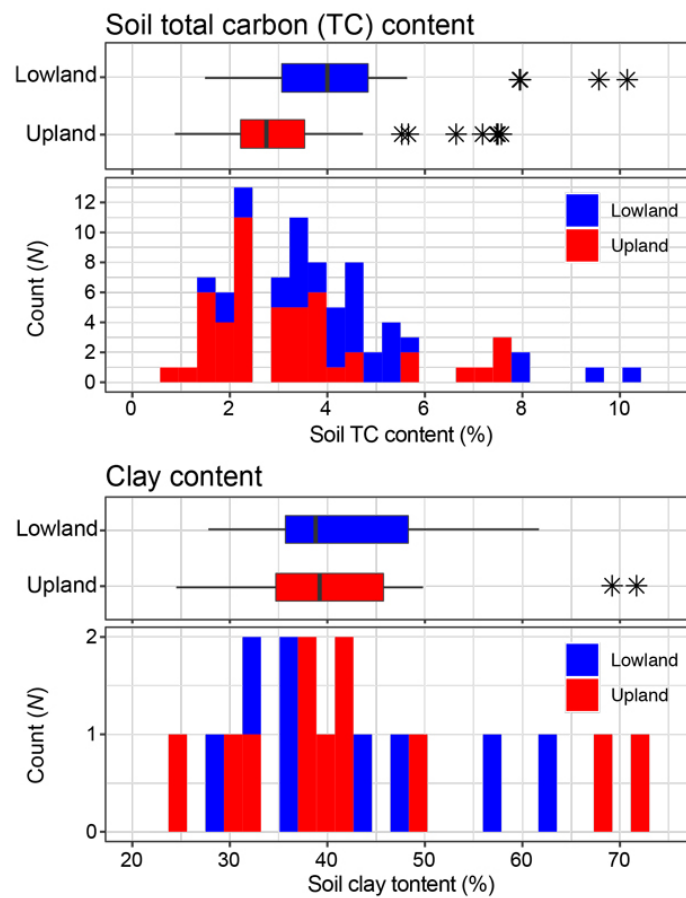

1  
2  
3

SI: Figure S1. Box plot and histogram of soil total carbon (TC) and clay contents in the lowland and upland data sets.
